# Supplementary material
Source: PubMed Central journal article supplement (PMC3752328)

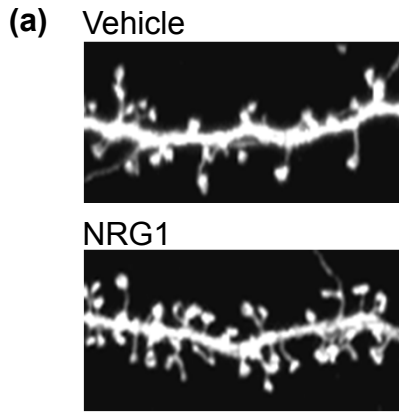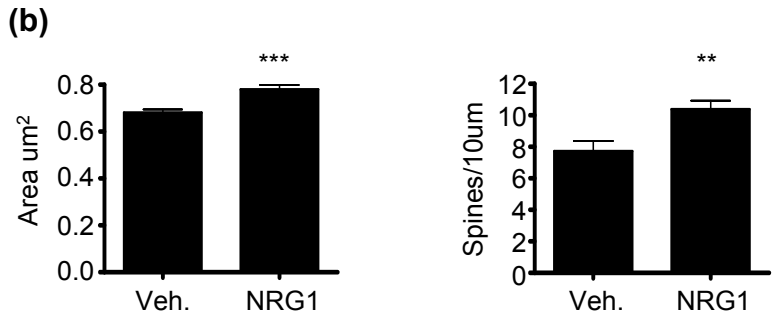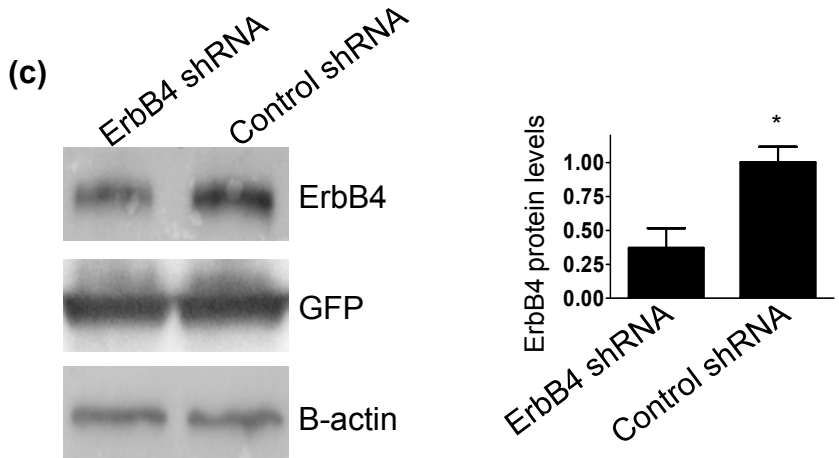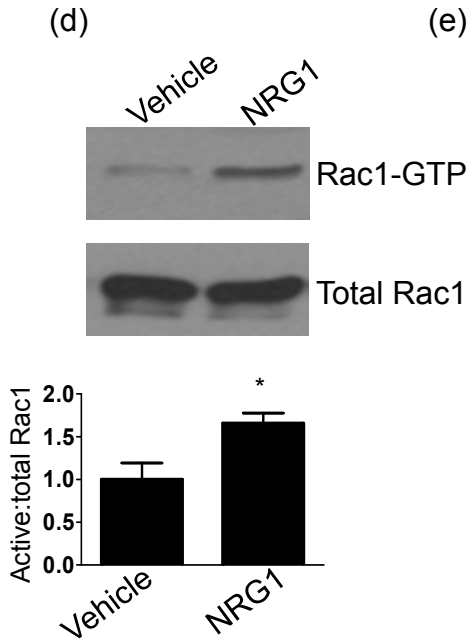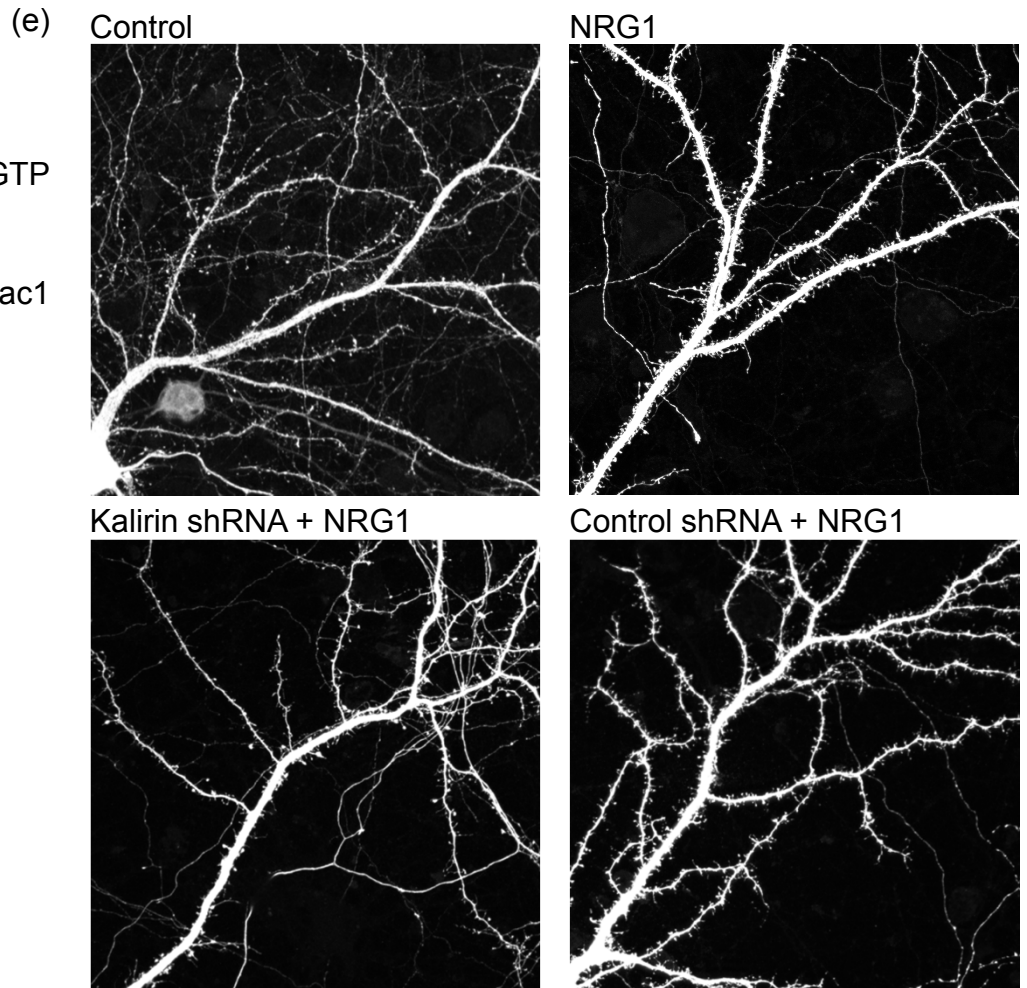

Figure S1

(a)

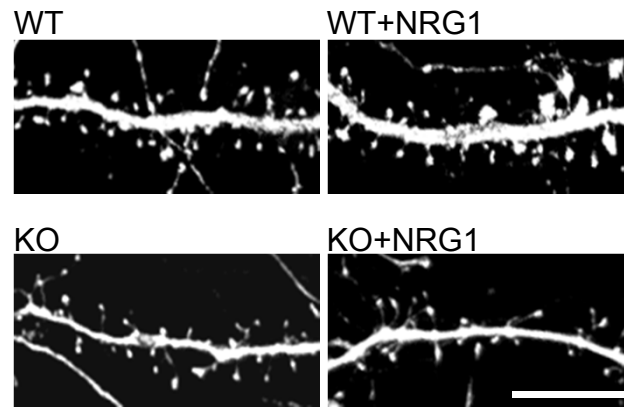

(b)

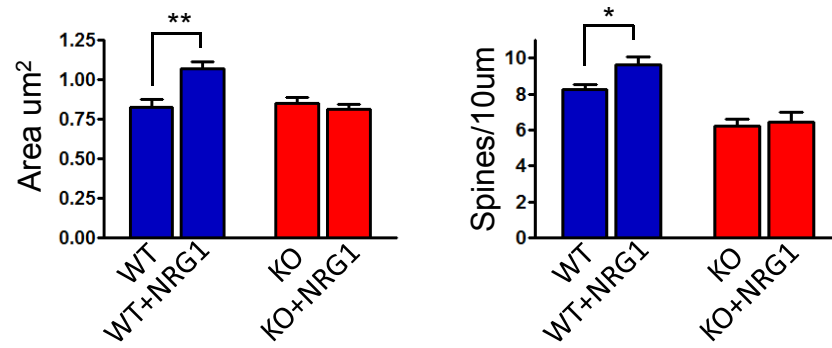

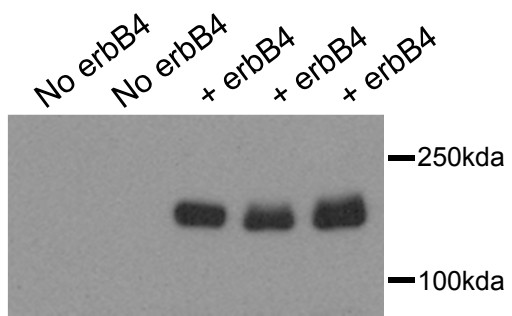

Figure S3

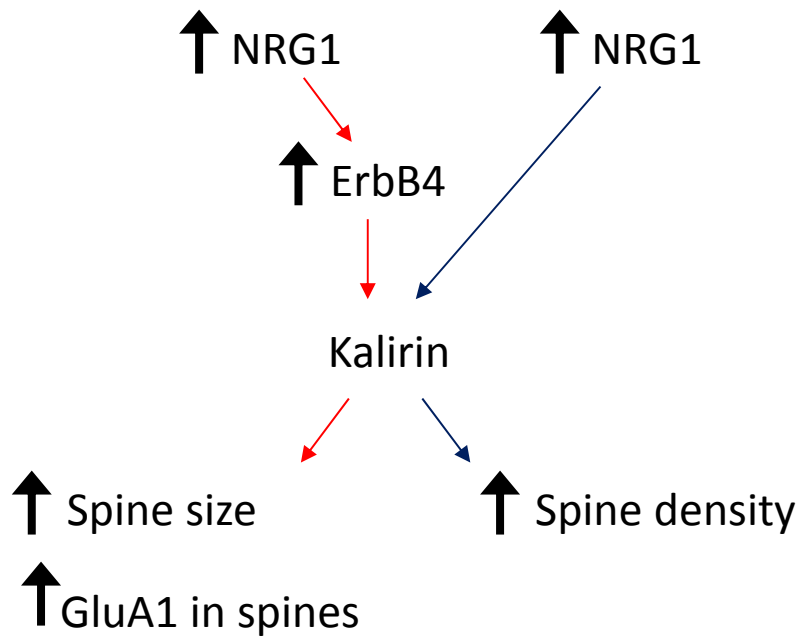

Figure S4

Supplement: NIHMS494083-supplement-Supp_Fig_S1-S4.pdf [file NIHMS494083-supplement-Supp_Fig_S1-S4.pdf]
